# Supplementary material for: Recurrent histone mutations in T‐cell acute lymphoblastic leukaemia
Source: PubMed Central journal article supplement (PMC6766952; doi:10.1111/bjh.15155), 2018-03-30
Supplement: BJH-184-676-s001.pdf [file BJH-184-676-s001.pdf]

## Supplementary Figure 1

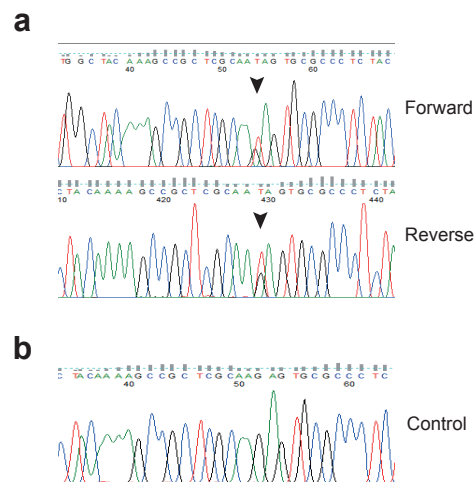

**Supplementary Figure 1 | Histone 3 mutation in T-ALL validation cohort. (a)** Bidirectional Sanger sequencing chromatograms of genomic T-ALL DNA showing a *H3F3A* p.K27N mutation (AAG>AAT). **(b)** Unidirectional trace from a control sample. T-ALL; T-cell acute lymphoblastic leukaemia.
